# Supplementary material for: Metformin protects from oxaliplatin induced peripheral neuropathy in rats
Source: PubMed Central journal article supplement (PMC7260677; doi:10.1016/j.ynpai.2020.100048), 2020-05-22

# Supplementary figure 1

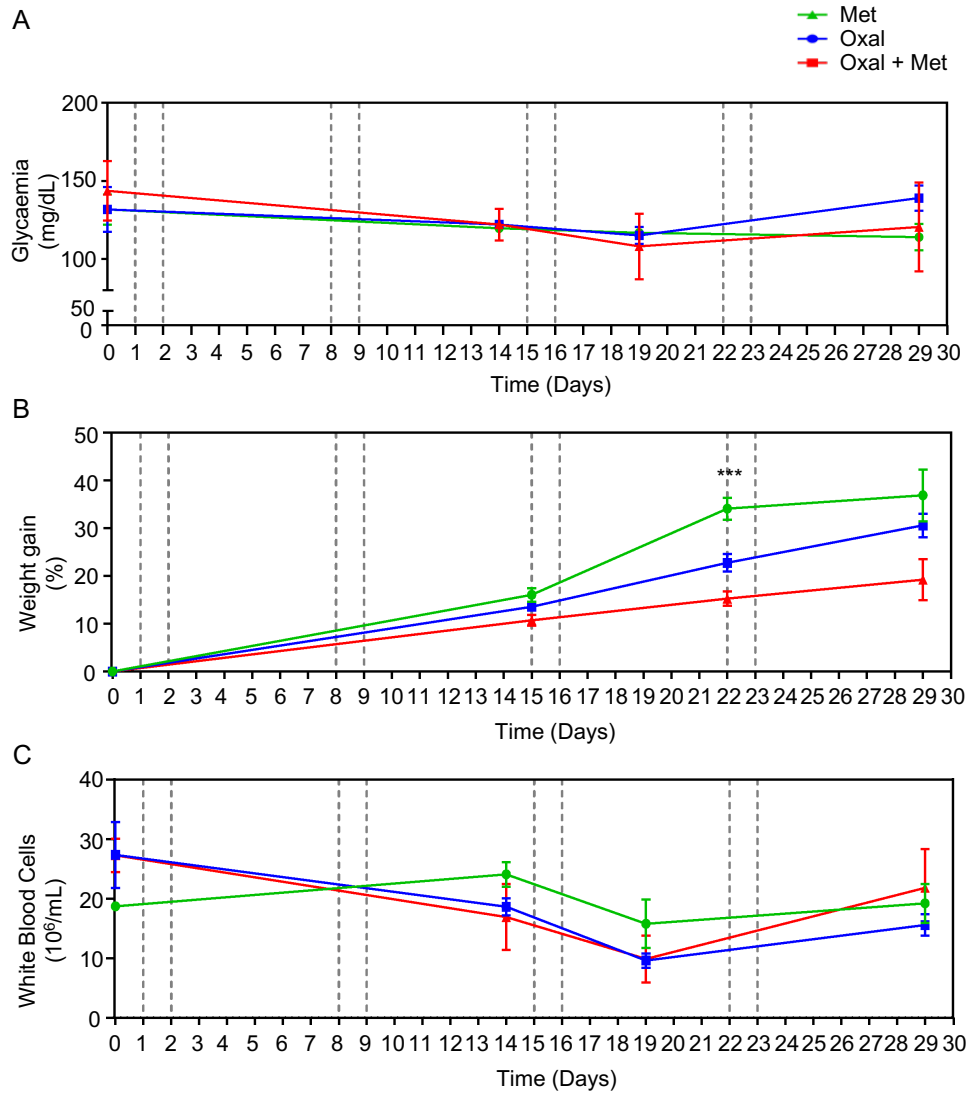

Supplement: mmc2.pdf [file mmc2.pdf]
